# Supplementary material for: Overview of histologic variants of urothelial carcinoma: current trends and narrative review on treatment outcomes
Source: PubMed Central journal article supplement — Transl Androl Urol. 2022 Jun;11(6):877–901. doi: 10.21037/tau-22-43 (PMC9262735; doi:10.21037/tau-22-43), 2022-06
Supplement: tau-11-06-877-supplementary.pdf [file tau-11-06-877-supplementary.pdf]

**Table S1** Search strategy results/query box

| Regular keyword combination                                                                                                                                                   | Database | Results |
|-------------------------------------------------------------------------------------------------------------------------------------------------------------------------------|----------|---------|
| “variant histology bladder cancer” AND “radical cystectomy” AND “neoadjuvant chemotherapy”                                                                                    | PubMed   | 64      |
| (“Urothelial carcinoma” OR “urothelial cancer” OR “bladder cancer” OR “bladder carcinoma”) AND (“variant” OR “differentiation” OR “VH”) AND (“multivariate OR multivariable”) | PubMed   | 495     |
| MeSH term and keyword combination, (MeSH term) AND (Regular keywords)                                                                                                         | Database | Results |
| “transitional cell, carcinoma”                                                                                                                                                |          |         |
| AND “micropapillary variant”                                                                                                                                                  | PubMed   | 98      |
| AND “plasmacytoid variant”                                                                                                                                                    | PubMed   | 71      |
| AND “nested variant”                                                                                                                                                          | PubMed   | 56      |
| AND “sarcomatoid variant”                                                                                                                                                     | PubMed   | 40      |
| AND “lymphoepithelioma-like”                                                                                                                                                  | PubMed   | 27      |
| AND “clear cell variant”                                                                                                                                                      | PubMed   | 40      |
| AND “microcystic variant”                                                                                                                                                     | PubMed   | 18      |
| AND “squamous differentiation”                                                                                                                                                | PubMed   | 417     |
| AND “glandular differentiation”                                                                                                                                               | PubMed   | 106     |
| MeSH term Combinations                                                                                                                                                        | Database | Results |
| “Carcinoma, transitional cell/therapy” AND “neoadjuvant therapy/methods”                                                                                                      | PubMed   | 72      |
